# Supplementary material
Source: MDPI journal article supplement (https://www.mdpi.com/2073-4344/13/10/1331)
Supplement: s1 [file s1 › catalysts-2599557-supplementary.pdf]

# Prominent COF, g-C<sub>3</sub>N<sub>4</sub>, and Their Heterojunction Materials for Selective Photocatalytic CO<sub>2</sub> Reduction

Panagiota Bika, Ilias Papailias, Tatiana Giannakopoulou, Christos Tampaxis, Theodore A. Steriotis, Christos Trapalis and Panagiotis Dallas \*

- Keywords:** COF, g-C<sub>3</sub>N<sub>4</sub>, heterojunction, UV irradiation, CO<sub>2</sub> photoreduction

## Supplementary Materials

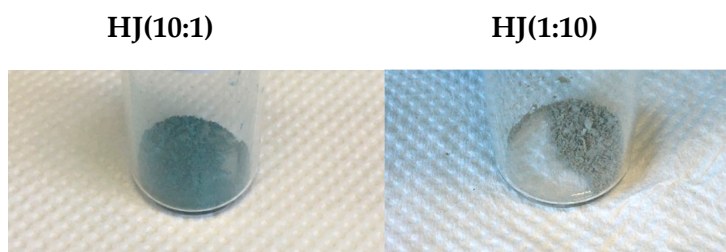

Figure S1. The synthesized green photocatalysts of HJ(10:1) and HJ(1:10).

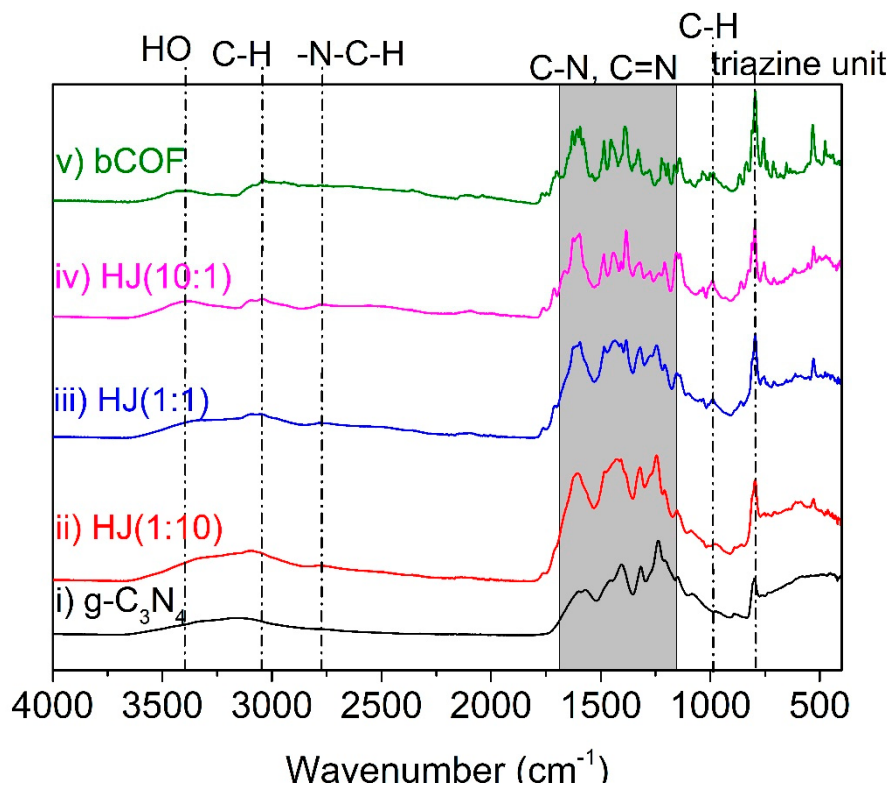

Figure S2. FTIR spectra in the range of 400 to 4000  $\text{cm}^{-1}$  for the synthesized pristine (i, v) and heterojunction (ii, iii, iv) materials before the photocatalytic process.

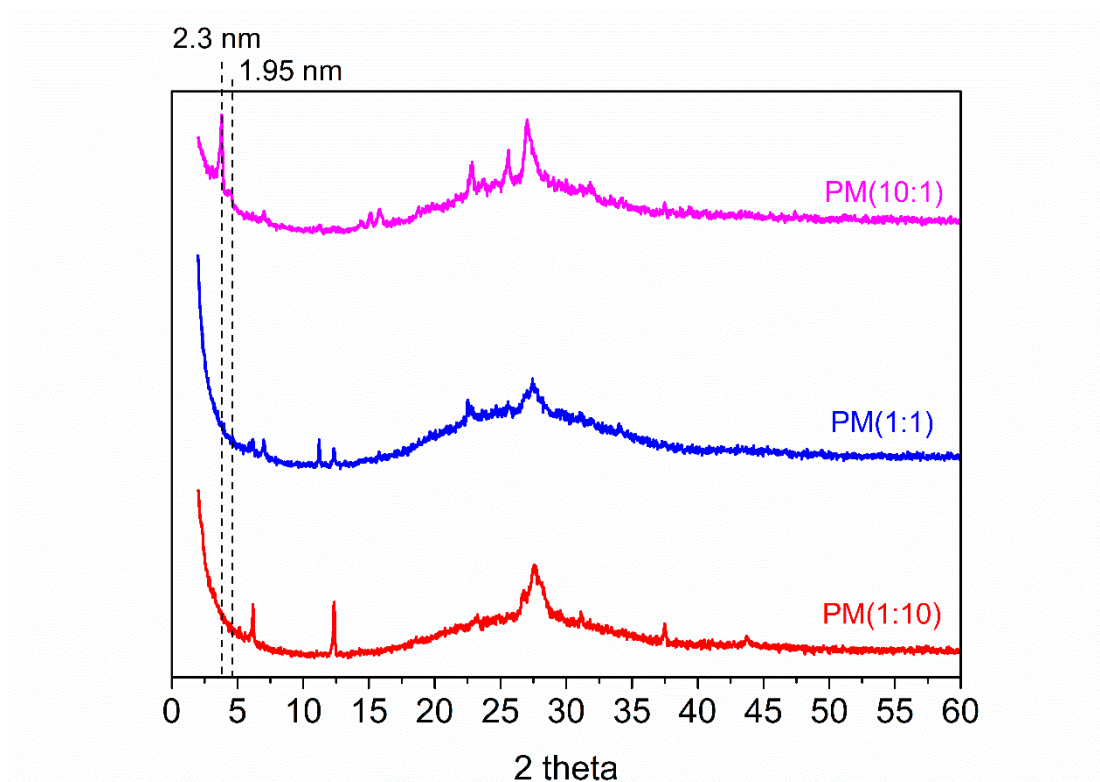

Figure S3. XRD of the physical mixed materials prior to  $\text{CO}_2$  reduction process

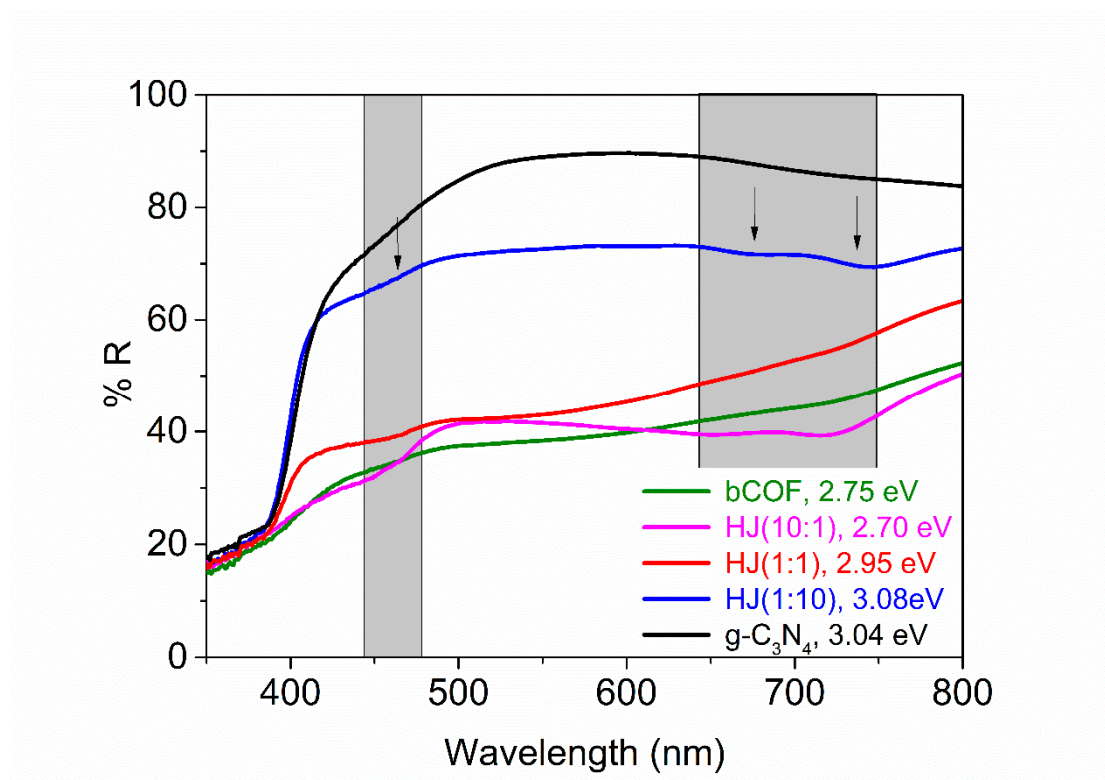

Figure S4. UV-Vis diffuse reflectance spectra of the synthesized pristine and heterojunction materials.

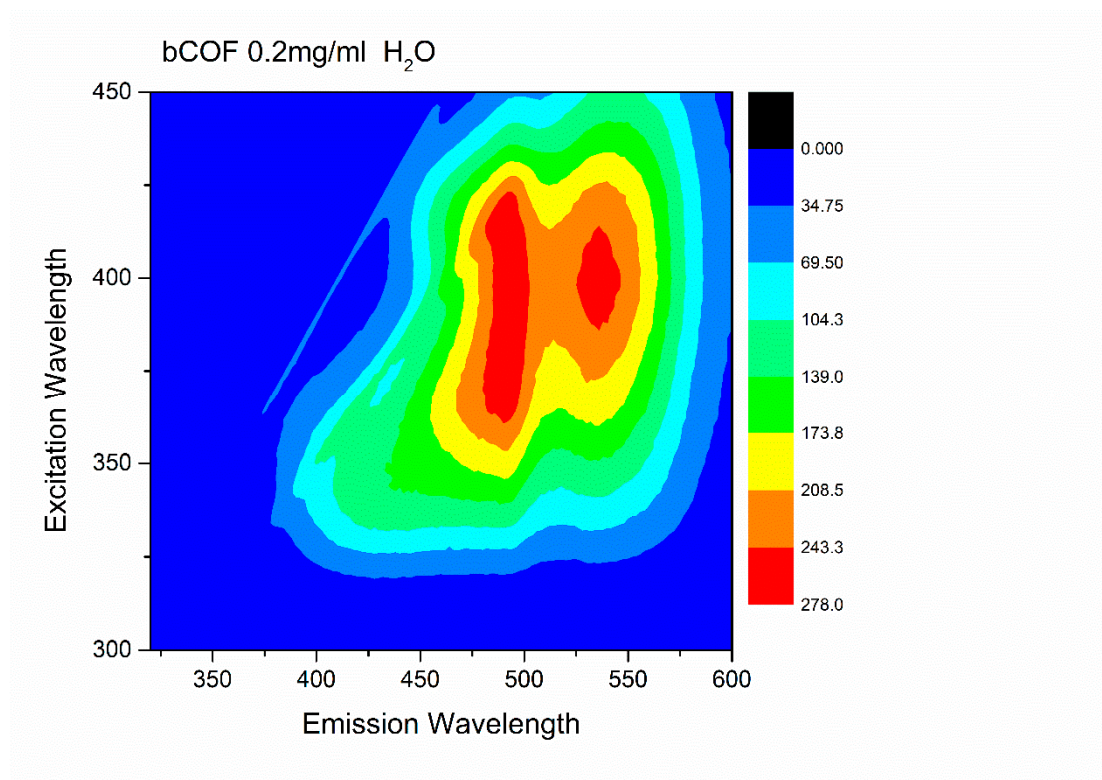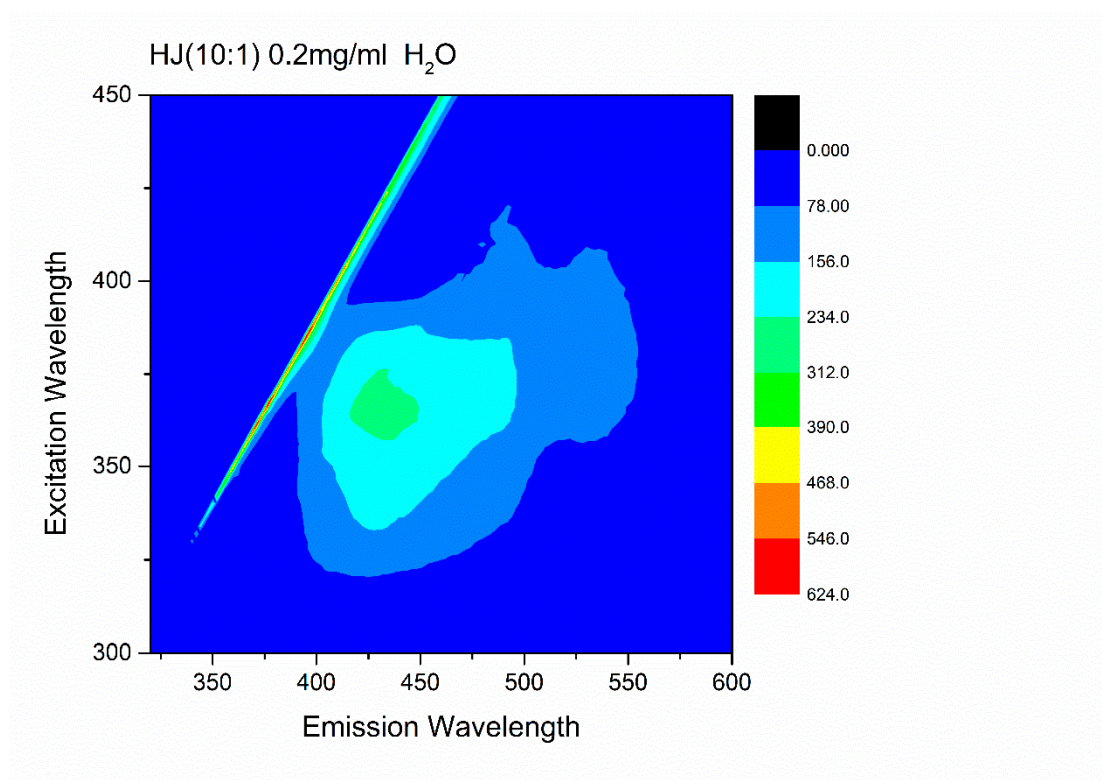

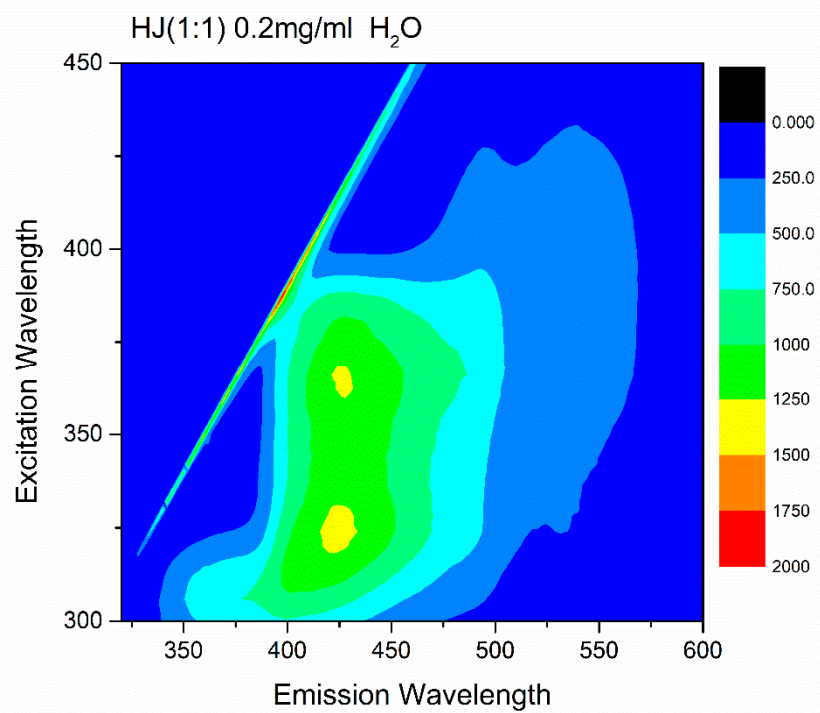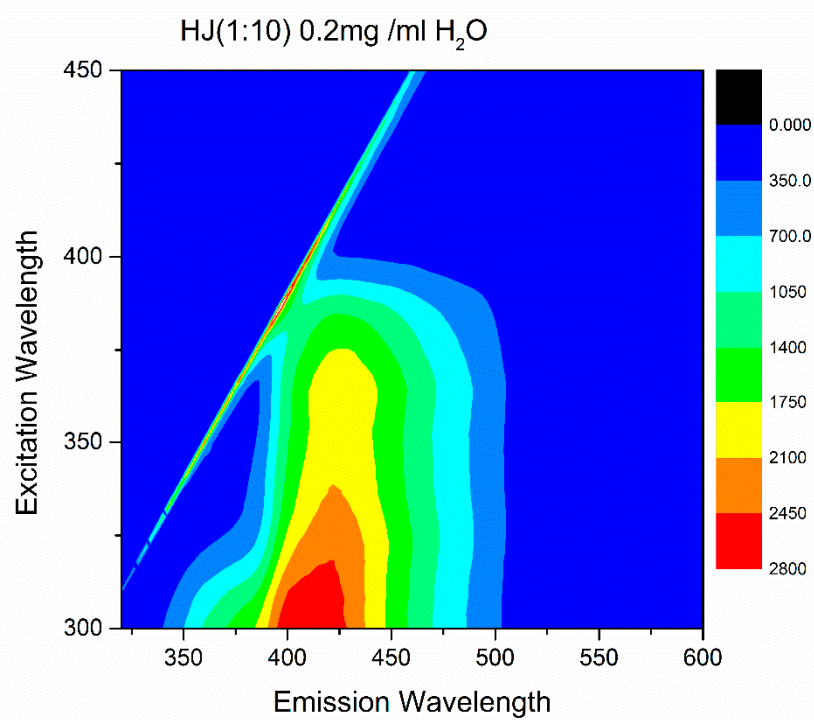

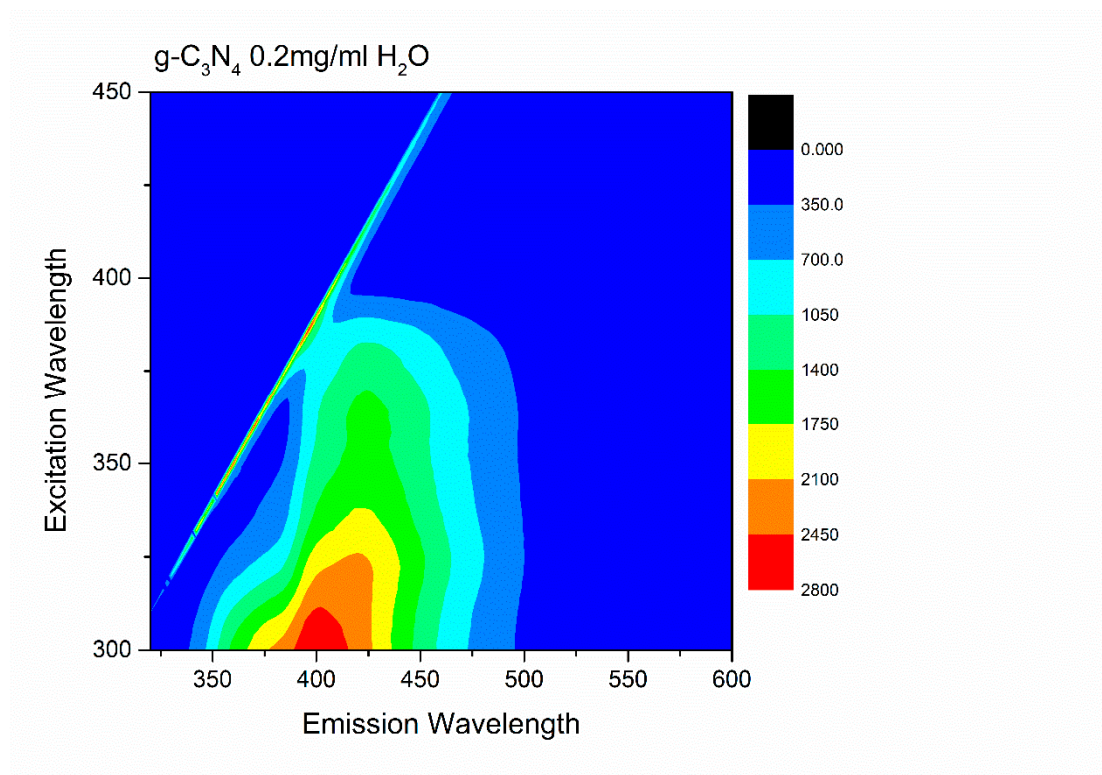

Figure S5. The excitation-dependent photoluminescence maps of the photocatalysts in aqueous dispersions. Concentration: 0.2 mg/ml. (Variations at the representation of the maximum in the color mapping occur also due to the scattering line provoked by the cuvette in the graphs.)

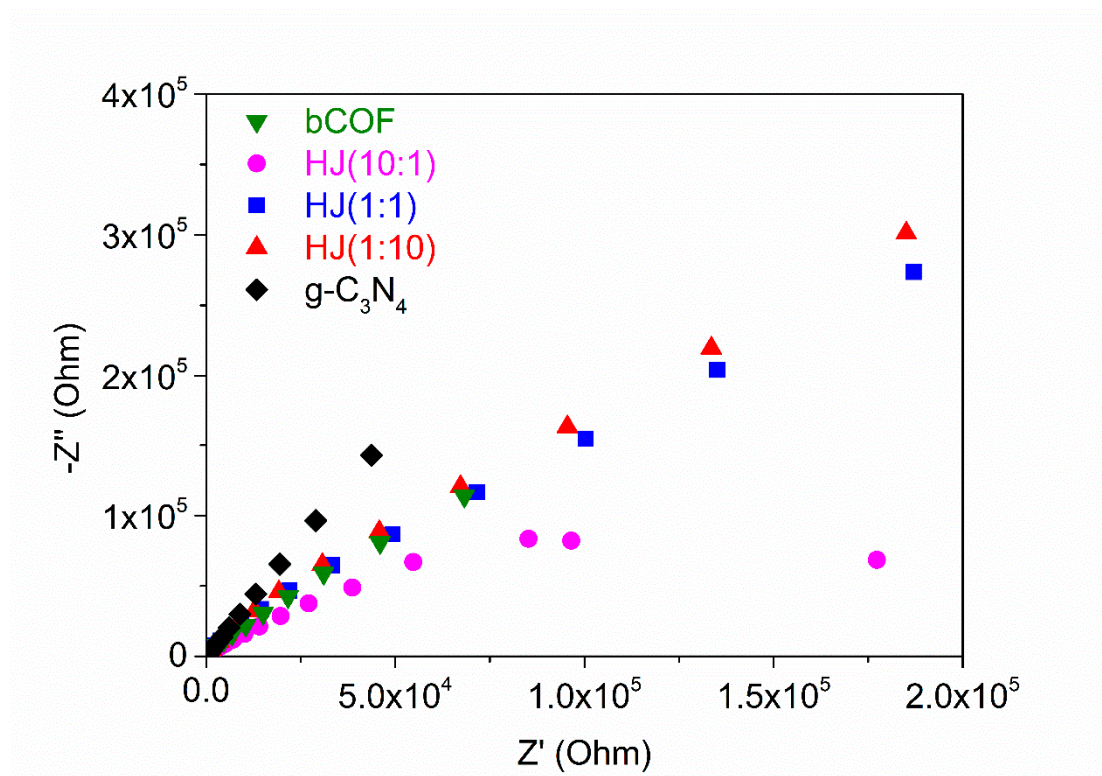

Figure S6. Electrochemical Impedance Spectroscopy measurements of the photocatalysts.

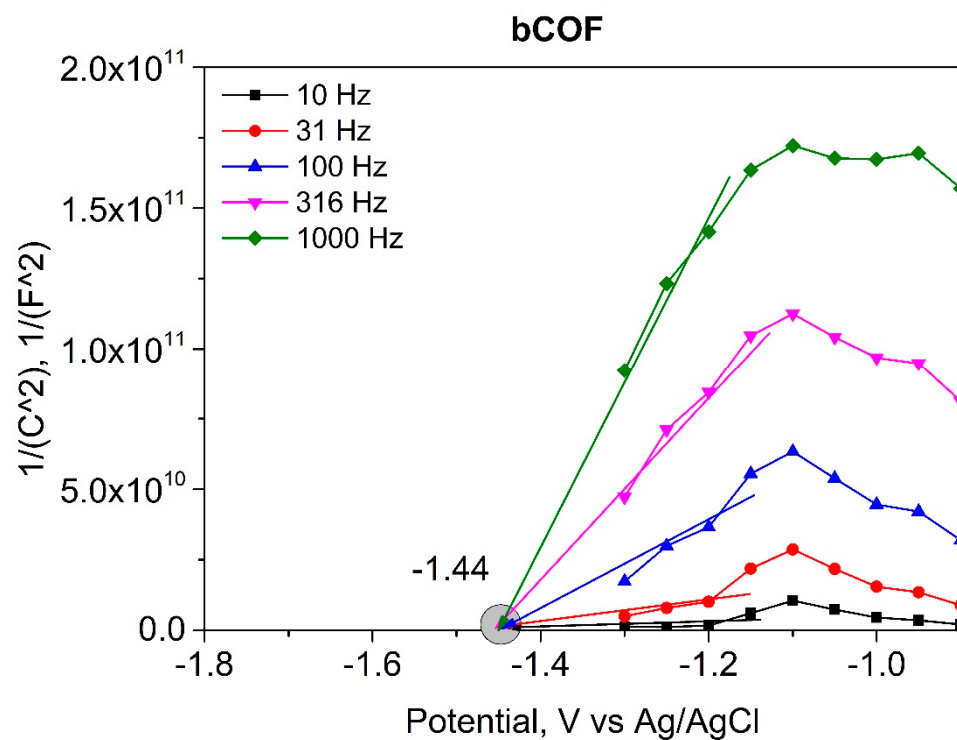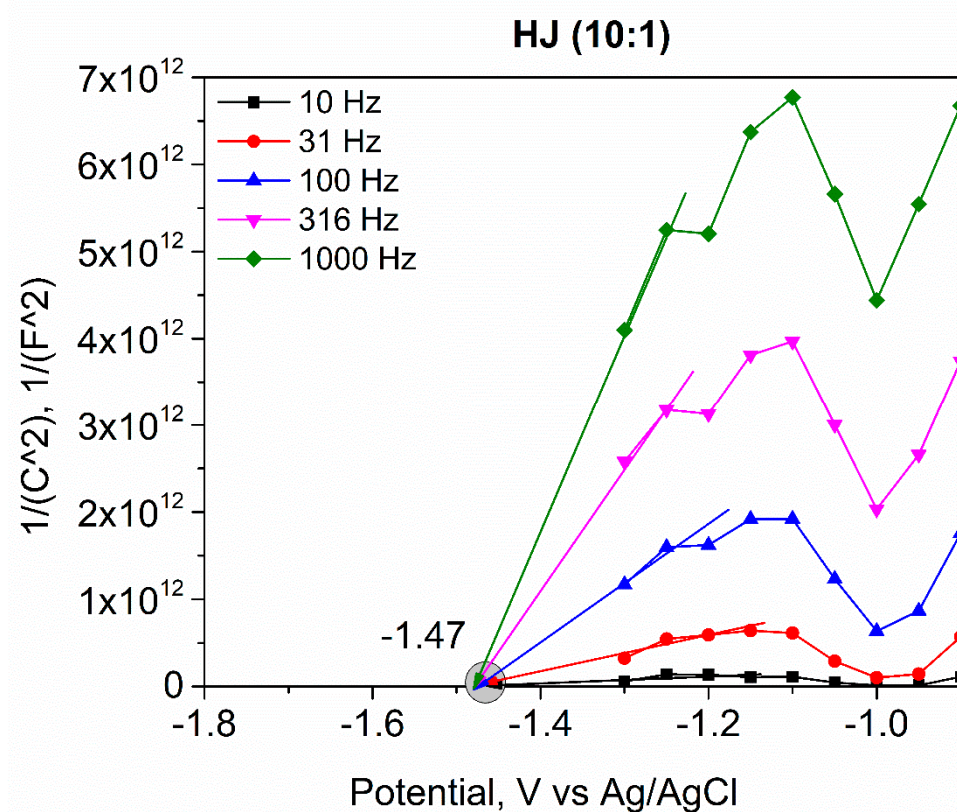

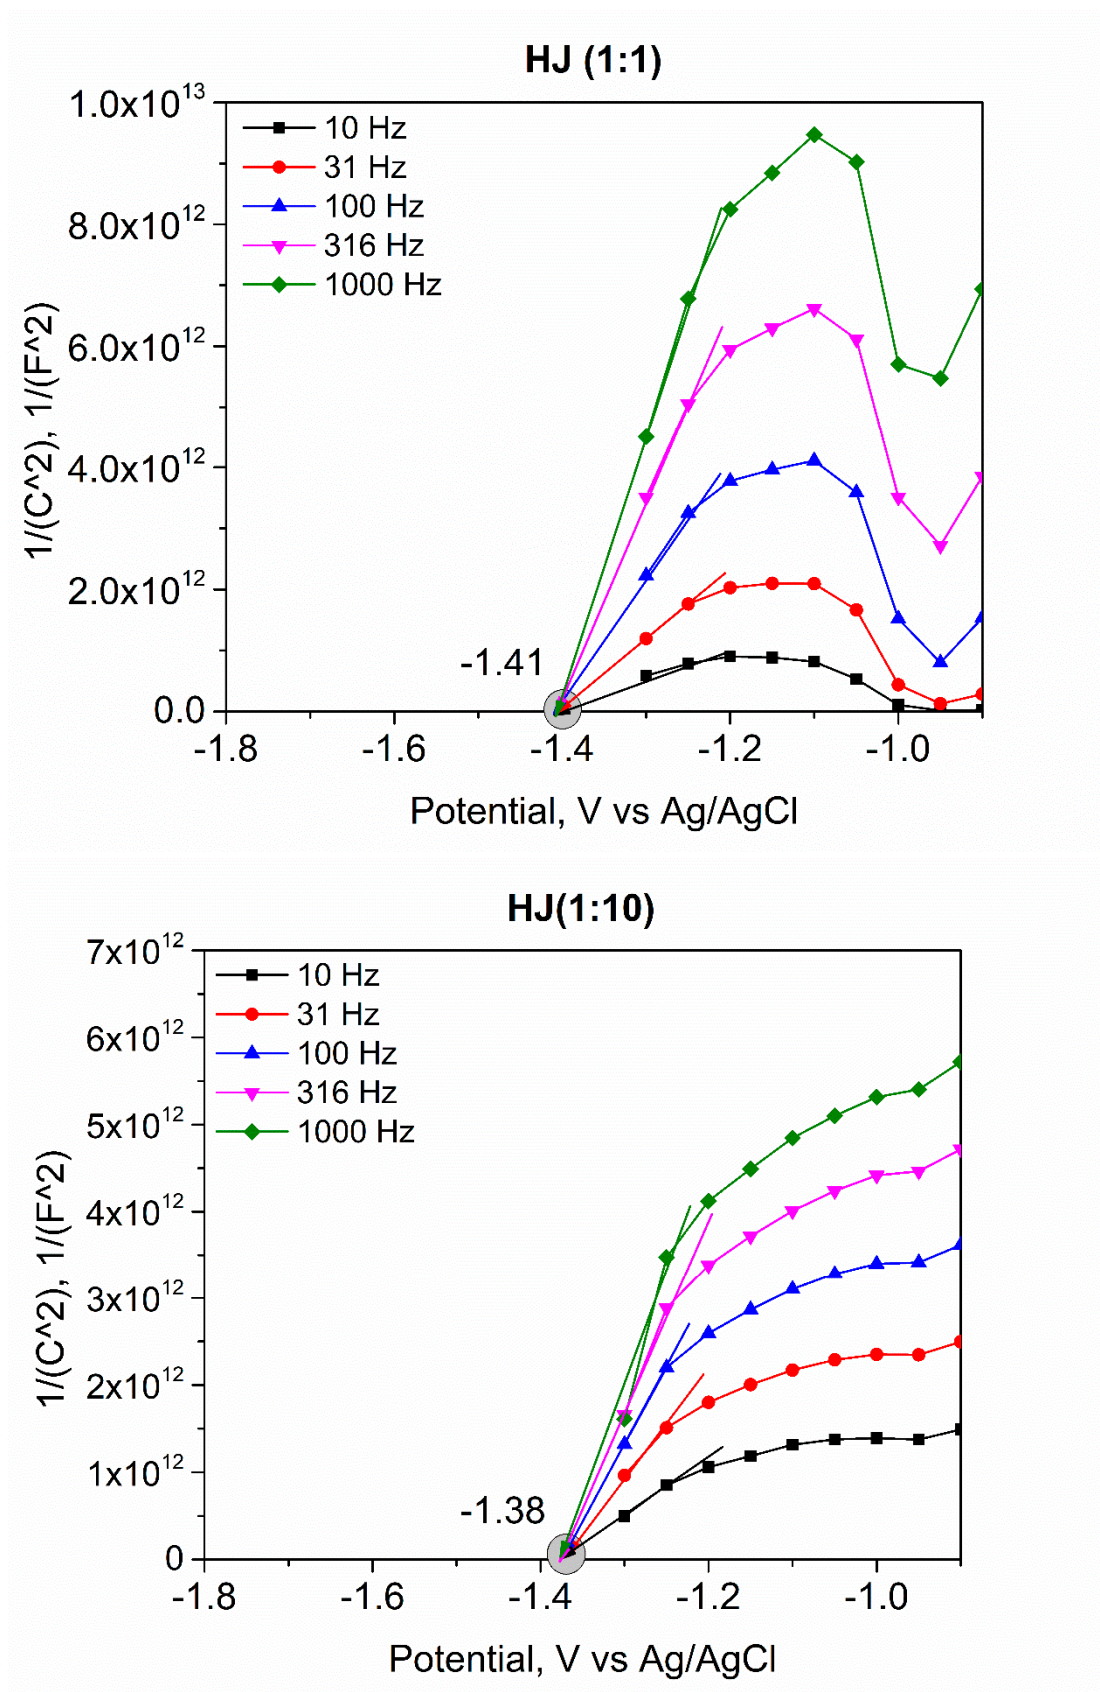

Figure S7. Mott-Schottky plots of the synthesized pristine and heterojunction materials.

Table S1. Multi-electron pathway for the CO<sub>2</sub> reduction: redox reaction and potentials.

|                          | Redox reaction                                                                                  | Potential (V) |
|--------------------------|-------------------------------------------------------------------------------------------------|---------------|
| Photoreduction reactions | $\text{CO}_2 + \text{e}^- \rightarrow \text{CO}_2^{\cdot -}$                                    | -1.90         |
|                          | $\text{CO}_2 + 2\text{H}^+ + 2\text{e}^- \rightarrow \text{HCOOH}$                              | -0.61         |
|                          | $\text{CO}_2 + 2\text{H}^+ + 2\text{e}^- \rightarrow \text{CO} + \text{H}_2\text{O}$            | -0.53         |
|                          | $\text{CO}_2 + 4\text{H}^+ + 4\text{e}^- \rightarrow \text{HCHO} + \text{H}_2\text{O}$          | -0.48         |
|                          | $2\text{H}^+ + 2\text{e}^- \rightarrow \text{H}_2$                                              | -0.41         |
|                          | $\text{CO}_2 + 6\text{H}^+ + 6\text{e}^- \rightarrow \text{CH}_3\text{OH} + \text{H}_2\text{O}$ | -0.38         |
|                          | $\text{CO}_2 + 8\text{H}^+ + 8\text{e}^- \rightarrow \text{CH}_4 + 2\text{H}_2\text{O}$         | -0.24         |
| Photooxidation reaction  | $2\text{H}_2\text{O} \rightarrow \text{O}_2 + 4\text{H}^+ + 4\text{e}^-$                        | +0.81         |

Table S2. The energy band gaps, the Mott-Schottky values and the band edge potentials of the photocatalysts.

| vs. NHE,<br><b>pH=7</b>         | E <sub>g</sub> (eV) | Ag/AgCl | V <sub>CB</sub> | V <sub>VB</sub> |
|---------------------------------|---------------------|---------|-----------------|-----------------|
| bCOF                            | 2.75                | -1.44   | -1.30           | 1.45            |
| HJ(10:1)                        | 2.70                | -1.47   | -1.33           | 1.37            |
| HJ(1:1)                         | 2.95                | -1.41   | -1.27           | 1.68            |
| HJ(1:10)                        | 3.08                | -1.38   | -1.24           | 1.84            |
| g-C <sub>3</sub> N <sub>4</sub> | 3.04                | -1.32   | -1.18           | 1.86            |

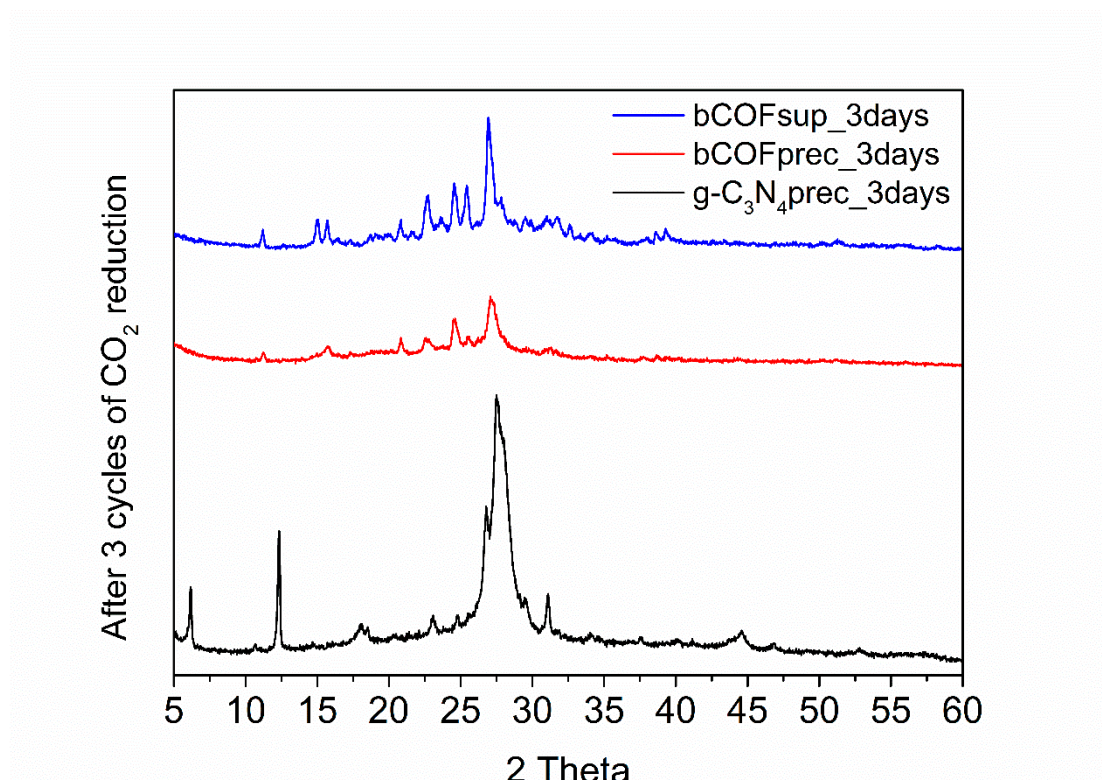

Figure S8. XRD patterns of the precipitate and supernatant pristine materials after the 3 days' sustainability cycle.

Table S3. Desorbed gaseous rates for the control experiment under Ar and UV irradiation for 18 h.

|                                 | H <sub>2</sub> (μmol g <sup>-1</sup> h <sup>-1</sup> ) | CO (μmol g <sup>-1</sup> h <sup>-1</sup> ) | CO <sub>2</sub> (μmol g <sup>-1</sup> h <sup>-1</sup> ) |
|---------------------------------|--------------------------------------------------------|--------------------------------------------|---------------------------------------------------------|
| bCOF                            | 0.25                                                   | 0.25                                       | 50.43                                                   |
| g-C <sub>3</sub> N <sub>4</sub> | 1.07                                                   | 1.32                                       | 27.80                                                   |

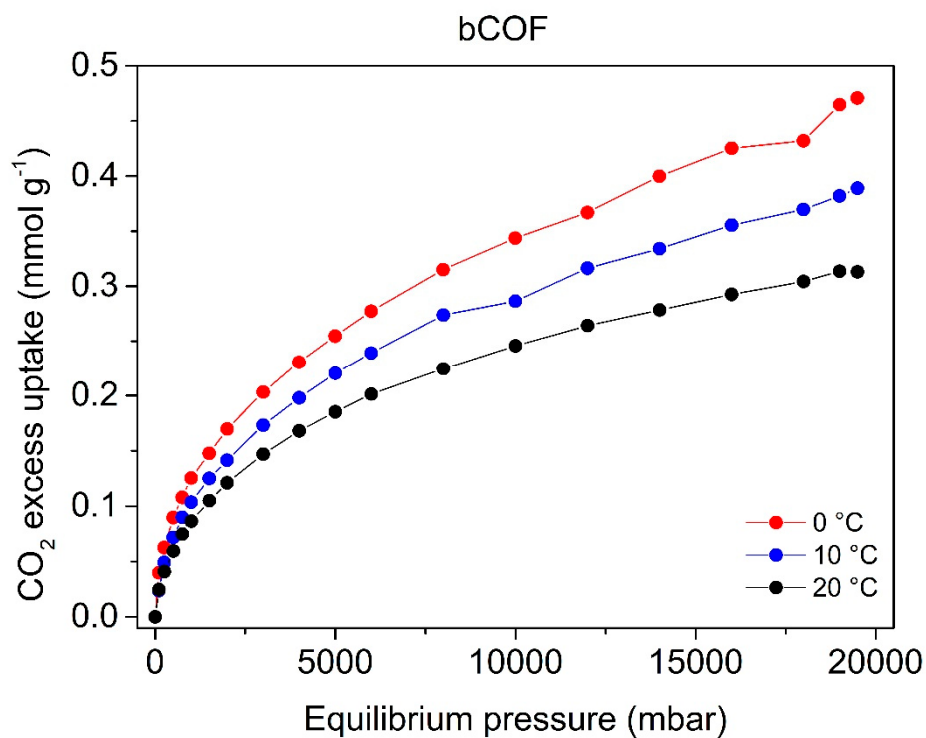

Figure S9. CO<sub>2</sub> sorption isotherms of bCOF measured at 0, 10 and 20 °C up to 20 bar.

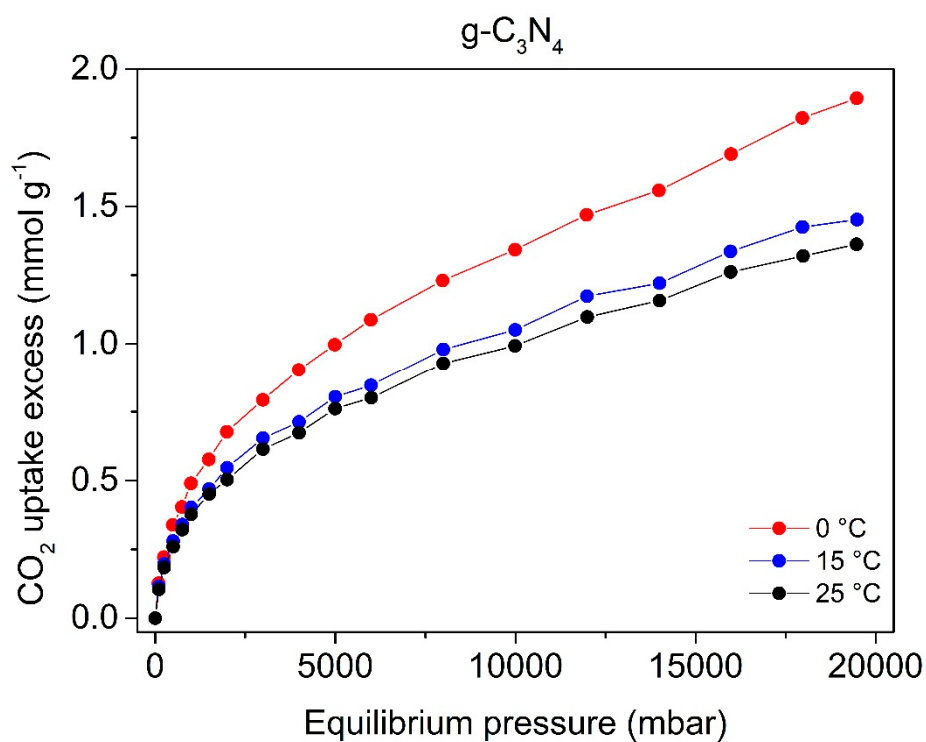

Figure S10. CO<sub>2</sub> sorption isotherms of g-C<sub>3</sub>N<sub>4</sub> measured at 0, 10 and 25 °C, up to 20 bar.

### **Calculations for the formation rate of the products after CO<sub>2</sub> photoreduction.**

The volume of the reactor is firstly calculated by its dimensions and then the occupied volume of the 100 ml of water is subtracted to determine the free volume filled with the gases.  $V_{\text{reactor}} = 242.11 \text{ ml}$ ,  $V_{\text{occupied}} = 100 \text{ ml}$ ,  $V_{\text{free}} = 141.11 \text{ ml}$

The total inlet CO<sub>2</sub> amount includes the gas of the free volume, where the pressure reaches 1.75 atm at 298.15 K and the soluble part into the aqueous dispersions. Through the ideal gas equation ( $P_{\text{total}}V = n_{\text{CO}_2}RT$ ) and Henry's law ( $S_{\text{CO}_2} = kP$ ), the total inlet CO<sub>2</sub> is 0.0162 moles.

Based on the outlet molar ratio of CO and the partial pressure from the Dalton equation ( $P_{\text{CO}} = xP_{\text{total}}$ ), the CO formation rate ( $\mu\text{mol g}^{-1} \text{ h}^{-1}$ ) is derived from further division with the mass of the photocatalyst and the hours of the photoreduction process.

As far as the H<sub>2</sub> production is concerned, the ideal gas equation is followed under the same conditions with  $P_{\text{H}_2}$  the partial pressure combined with the outlet molar ratio. Then the outcome is divided by the mass of the photocatalyst and the hours of the photoreduction process to obtain the H<sub>2</sub> formation rate.

In the control experiments where CO<sub>2</sub> was substituted by argon in the reactor, the ideal gas equation was used to calculate the outlet amounts of H<sub>2</sub>, CO and CO<sub>2</sub> gases under the same conditions.
